# Supplementary material for: Monitoring breast cancer response to neoadjuvant chemotherapy with ultrasound signal statistics and integrated backscatter
Source: PubMed Central journal article supplement (PMC6417657; doi:10.1371/journal.pone.0213749), 2019-03-14
Supplement: pone.0213749.s001.pdf [file pone.0213749.s001.pdf]

| Tumor no. | Response type | IBSC relative change [%] |              |              |              |              | ENS relative change [%] |              |              |              |              | Size relative change [%] |              |              |              |              |
|-----------|---------------|--------------------------|--------------|--------------|--------------|--------------|-------------------------|--------------|--------------|--------------|--------------|--------------------------|--------------|--------------|--------------|--------------|
|           |               | course no. 1             | course no. 2 | course no. 3 | course no. 4 | course no. 5 | course no. 1            | course no. 2 | course no. 3 | course no. 4 | course no. 5 | course no. 1             | course no. 2 | course no. 3 | course no. 4 | course no. 5 |
| 1         | non- resp.    | 206                      | 17           | 60           | 57           | 4            | 70                      | 35           | 17           | 32           | 104          | 35                       | -15          | -40          | -35          | -35          |
| 2         | non- resp.    | -34                      | -10          | -50          | -            | -            | -7                      | -13          | 7            | -            | -            | 8                        | -8           | 8            | -            | -            |
| 3         | non- resp.    | 4                        | 40           | -13          | -39          | -            | -1                      | 8            | -36          | -50          | -            | -4                       | -22          | -26          | -30          | -            |
| 4         | non- resp.    | 76                       | 4            | -14          | 57           | -47          | 6                       | 5            | -5           | 2            | 3            | 20                       | -20          | -7           | 0            | 13           |
| 5         | non- resp.    | -74                      | -55          | -33          | 14           | -43          | -5                      | -2           | 0            | 7            | 19           | -38                      | -19          | -19          | -23          | -19          |
| 6         | resp.         | -22                      | -20          | -23          | -46          | -15          | -58                     | -62          | -63          | -58          | -71          | 0                        | -10          | -30          | -40          | -60          |
| 7         | resp.         | 41                       | 12           | 122          | 25           | 34           | -39                     | 1            | -2           | -54          | -57          | 59                       | 0            | -4           | -52          | -70          |
| 8         | resp.         | -15                      | 36           | 121          | 180          | 232          | -67                     | -43          | -79          | -71          | -56          | 7                        | 2            | -24          | -59          | -63          |
| 9         | resp.         | -28                      | -41          | -11          | -60          | 54           | -44                     | -43          | -37          | -60          | -86          | -41                      | -26          | -22          | -41          | -44          |
| 10        | resp.         | -43                      | 267          | 170          | 124          | 95           | -19                     | -24          | -28          | -21          | -34          | 32                       | 12           | -12          | -36          | -52          |
| 11        | resp.         | -1                       | 23           | 16           | 91           | -            | -37                     | 24           | -32          | -35          | -            | -32                      | -45          | -58          | -55          | -            |
| 12        | resp.         | -23                      | 0            | 78           | 136          | -            | -13                     | -10          | -11          | -95          | -            | 4                        | -13          | -8           | -38          | -            |
| 13        | resp.         | 3                        | 8            | 28           | 47           | 284          | -23                     | -17          | -92          | -99          | -119         | -41                      | -41          | -19          | -19          | -41          |
| 14        | resp.         | -15                      | 36           | 121          | 180          | 232          | 13                      | -81          | -92          | -98          | -126         | -28                      | -28          | -38          | -41          | -45          |
| 15        | resp.         | -15                      | 76           | 36           | 121          | -            | -15                     | -76          | -36          | -121         | -            | -17                      | 0            | 17           | 0            | -            |
| 16        | resp.         | 81                       | -20          | -34          | 56           | 82           | 20                      | 58           | 26           | 13           | -21          | -14                      | -33          | -43          | -48          | -62          |
| 17        | resp.         | -15                      | -60          | -6           | 120          | 137          | 24                      | -65          | -100         | -84          | -70          | -10                      | -30          | -20          | -20          | -20          |
| 18        | resp.         | 224                      | 273          | -            | -            | -            | -89                     | -97          | -            | -            | -            | 20                       | -20          | -            | -            | -            |
| 19        | resp.         | 35                       | 90           | 137          | 279          | 349          | 86                      | 12           | -18          | -36          | -33          | -9                       | 0            | -14          | -27          | -50          |
| 20        | resp.         | 32                       | -5           | 37           | 266          | -            | 2                       | -5           | -8           | -116         | -            | 23                       | -15          | -23          | -46          | -            |
| 21        | resp.         | 12                       | 48           | 87           | 115          | -            | -30                     | -30          | -53          | -62          | -            | 17                       | 17           | -25          | -42          | -            |
| 22        | resp.         | 35                       | 70           | 95           | 58           | -            | 3                       | -6           | -17          | -23          | -            | 6                        | 3            | 0            | -6           | -            |
| 23        | resp.         | 44                       | 73           | 56           | 160          | -            | 3                       | -12          | -55          | -79          | -            | -20                      | -35          | -35          | -40          | -            |
| 24        | resp.         | 114                      | 207          | 233          | 147          | -            | -2                      | -25          | -35          | -114         | -            | 0                        | -9           | -18          | -18          | -            |
